# Supplementary material
Source: PubMed Central journal article supplement (PMC10751025)
Supplement: NIHMS1906137-supplement-Supplementary_Table.pdf [file NIHMS1906137-supplement-Supplementary_Table.pdf]

| Variable Name               | Description                          | Fixed/<br>Temporal | Category/ EHR<br>domain | Unit   | Valid Range | Time windows used<br>(in hours)                                                            | Summary Statistics             | Number of<br>predictors |
|-----------------------------|--------------------------------------|--------------------|-------------------------|--------|-------------|--------------------------------------------------------------------------------------------|--------------------------------|-------------------------|
| age                         | Age                                  | Fixed              | Demographics            | year   |             |                                                                                            |                                | 1                       |
| sex                         | Sex                                  | Fixed              | Demographics            |        | F, M        |                                                                                            |                                | 1                       |
| baseline_scr                | Baseline Serum Creatinine            | Fixed              | Lab Results             | mg/dL  | 0-4         |                                                                                            |                                | 1                       |
| ht                          | Baseline Height                      | Fixed              | Vital Signs             | inch   | 48-96       |                                                                                            |                                | 1                       |
| wt                          | Baseline Weight                      | Fixed              | Vital Signs             | pound  | 60-700      |                                                                                            |                                | 1                       |
| bmi                         | Baseline BMI                         | Fixed              | Vital Signs             | kg/m2  | 15-50       |                                                                                            |                                | 1                       |
| myocardial_infarction       | Myocardial Infarction                | Fixed              | Comorbidities           |        | 0, 1        |                                                                                            |                                | 1                       |
| congestive_heart_failure    | Congestive Heart Failure (CHF)       | Fixed              | Comorbidities           |        | 0, 1        |                                                                                            |                                | 1                       |
| peripheral_vascular_disease | Peripheral Vascular Disease (PVD)    | Fixed              | Comorbidities           |        | 0, 1        |                                                                                            |                                | 1                       |
| cerebrovascular_disease     | Cerebrovascular Disease              | Fixed              | Comorbidities           |        | 0, 1        |                                                                                            |                                | 1                       |
| chronic_pulmonary_disease   | Chronic Pulmonary Disease            | Fixed              | Comorbidities           |        | 0, 1        |                                                                                            |                                | 1                       |
| dementia                    | Dementia                             | Fixed              | Comorbidities           |        | 0, 1        |                                                                                            |                                | 1                       |
| paralysis                   | Paralysis                            | Fixed              | Comorbidities           |        | 0, 1        |                                                                                            |                                | 1                       |
| diabetes_uncomplicated      | Diabetes Mellitus, Uncomplicated     | Fixed              | Comorbidities           |        | 0, 1        |                                                                                            |                                | 1                       |
| diabetes_complicated        | Diabetes Mellitus, Complicated       | Fixed              | Comorbidities           |        | 0, 1        |                                                                                            |                                | 1                       |
| kidney_disease              | Kidney Disease                       | Fixed              | Comorbidities           |        | 0, 1        |                                                                                            |                                | 1                       |
| mild_liver_disease          | Mild Liver Disease                   | Fixed              | Comorbidities           |        | 0, 1        |                                                                                            |                                | 1                       |
| mod_severe_liver_disease    | Moderate or Severe Liver Disease     | Fixed              | Comorbidities           |        | 0, 1        |                                                                                            |                                | 1                       |
| peptic_ulcer_disease        | Peptic Ulcer Disease                 | Fixed              | Comorbidities           |        | 0, 1        |                                                                                            |                                | 1                       |
| rheumatic_disease           | Rheumatoid Disease                   | Fixed              | Comorbidities           |        | 0, 1        |                                                                                            |                                | 1                       |
| hiv_aids                    | HIV/AIDS                             | Fixed              | Comorbidities           |        | 0, 1        |                                                                                            |                                | 1                       |
| metastatic_cancer           | Metastatic Cancer                    | Fixed              | Comorbidities           |        | 0, 1        |                                                                                            |                                | 1                       |
| non-metastatic_cancer       | Non-Metastatic Cancer                | Fixed              | Comorbidities           |        | 0, 1        |                                                                                            |                                | 1                       |
| surgical_service            | Surgical Service                     | Fixed              | Service                 |        | 0, 1        |                                                                                            |                                | 1                       |
| icu_location                | ICU location                         | Fixed              | Location                |        | 0, 1        |                                                                                            |                                | 1                       |
| time                        | Time (hours) from Admission          | Temporal           |                         |        |             |                                                                                            |                                | 1                       |
| drug_AM300                  | Aminoglycosides                      | Temporal           | Medications             |        |             | -24 to 0, -48 to -24, -96 to -48, -120 to -96, -144 to -120, -168 to -144, -192 to -168    | length                         | 7                       |
| drug_AU100                  | Sympathomimetics (Adrenergics)       | Temporal           | Medications             |        |             | -24 to 0, -48 to -24, -96 to -48, -120 to -96, -144 to -120, -168 to -144, -192 to -168    | length                         | 7                       |
| drug_CV100                  | Beta Blockers/related                | Temporal           | Medications             |        |             | -24 to 0, -48 to -24, -96 to -48, -120 to -96, -144 to -120, -168 to -144, -192 to -168    | length                         | 7                       |
| drug_CV150                  | Alpha Blockers/related               | Temporal           | Medications             |        |             | -24 to 0, -48 to -24, -96 to -48, -120 to -96, -144 to -120, -168 to -144, -192 to -168    | length                         | 7                       |
| drug_CV200                  | Calcium Channel Blockers             | Temporal           | Medications             |        |             | -24 to 0, -48 to -24, -96 to -48, -120 to -96, -144 to -120, -168 to -144, -192 to -168    | length                         | 7                       |
| drug_CV350                  | Antilipemic Agents                   | Temporal           | Medications             |        |             | -24 to 0, -48 to -24, -96 to -48, -120 to -96, -144 to -120, -168 to -144, -192 to -168    | length                         | 7                       |
| drug_CV702                  | Loop Diuretics                       | Temporal           | Medications             |        |             | -24 to 0, -48 to -24, -96 to -48, -120 to -96, -144 to -120, -168 to -144, -192 to -168    | length                         | 7                       |
| drug_CV800                  | ACE Inhibitors                       | Temporal           | Medications             |        |             | -24 to 0, -48 to -24, -96 to -48, -120 to -96, -144 to -120, -168 to -144, -192 to -168    | length                         | 7                       |
| drug_CV805                  | Angiotensin II Inhibitor             | Temporal           | Medications             |        |             | -24 to 0, -48 to -24, -96 to -48, -120 to -96, -144 to -120, -168 to -144, -192 to -168    | length                         | 7                       |
| drug_DX101                  | Non-Ionic Contrast Media             | Temporal           | Medications             |        |             | -24 to 0, -48 to -24, -96 to -48, -120 to -96, -144 to -120, -168 to -144, -192 to -168    | length                         | 7                       |
| drug_MS102                  | Nonsalicylate NSAIs, Antirheumatic   | Temporal           | Medications             |        |             | -6 to 0, -12 to -6, -18 to -12, -24 to -18, -30 to -24, -36 to -24, -42 to -36, -48 to -42 | length                         | 7                       |
| Albumin                     | Serum Albumin                        | Temporal           | Lab Results             | g/dL   | 0.5-8       | -6 to 0, -12 to -6, -18 to -12, -24 to -18, -30 to -24, -36 to -24, -42 to -36, -48 to -42 | length, min, mean, median, max | 40                      |
| Alkaline                    | Alkaline Phosphatase                 | Temporal           | Lab Results             | IU/L   | 1-10000     | -6 to 0, -12 to -6, -18 to -12, -24 to -18, -30 to -24, -36 to -24, -42 to -36, -48 to -42 | length, min, mean, median, max | 40                      |
| ALT                         | Alanine Aminotransferase             | Temporal           | Lab Results             | IU/L   | 1-10000     | -6 to 0, -12 to -6, -18 to -12, -24 to -18, -30 to -24, -36 to -24, -42 to -36, -48 to -42 | length, min, mean, median, max | 40                      |
| AST                         | Aspartate Transaminase               | Temporal           | Lab Results             | U/L    | 1-10000     | -6 to 0, -12 to -6, -18 to -12, -24 to -18, -30 to -24, -36 to -24, -42 to -36, -48 to -42 | length, min, mean, median, max | 40                      |
| Bilirubin_D                 | Bilirubin (Direct)                   | Temporal           | Lab Results             | mg/dL  | 0-50        | -6 to 0, -12 to -6, -18 to -12, -24 to -18, -30 to -24, -36 to -24, -42 to -36, -48 to -42 | length, min, mean, median, max | 40                      |
| Bilirubin                   | Bilirubin (Total)                    | Temporal           | Lab Results             | mg/dL  | 0-50        | -6 to 0, -12 to -6, -18 to -12, -24 to -18, -30 to -24, -36 to -24, -42 to -36, -48 to -42 | length, min, mean, median, max | 40                      |
| BUN                         | Blood Urea Nitrogen                  | Temporal           | Lab Results             | mg/dL  | 1-300       | -6 to 0, -12 to -6, -18 to -12, -24 to -18, -30 to -24, -36 to -24, -42 to -36, -48 to -42 | length, min, mean, median, max | 40                      |
| Calcium                     | Serum Calcium                        | Temporal           | Lab Results             | mg/dL  | 3-20        | -6 to 0, -12 to -6, -18 to -12, -24 to -18, -30 to -24, -36 to -24, -42 to -36, -48 to -42 | length, min, mean, median, max | 40                      |
| Carbon                      | Carbon Dioxide                       | Temporal           | Lab Results             | meq/dL | 1-60        | -6 to 0, -12 to -6, -18 to -12, -24 to -18, -30 to -24, -36 to -24, -42 to -36, -48 to -42 | length, min, mean, median, max | 40                      |
| Chloride                    | Serum Chloride                       | Temporal           | Lab Results             | meq/dL | 60-150      | -6 to 0, -12 to -6, -18 to -12, -24 to -18, -30 to -24, -36 to -24, -42 to -36, -48 to -42 | length, min, mean, median, max | 40                      |
| Glucose                     | Serum Glucose                        | Temporal           | Lab Results             | mg/dL  | 10-1200     | -6 to 0, -12 to -6, -18 to -12, -24 to -18, -30 to -24, -36 to -24, -42 to -36, -48 to -42 | length, min, mean, median, max | 40                      |
| HDLC                        | High-Density Lipoprotein Cholesterol | Temporal           | Lab Results             | mg/dL  | 10-150      | -6 to 0, -12 to -6, -18 to -12, -24 to -18, -30 to -24, -36 to -24, -42 to -36, -48 to -42 | length, min, mean, median, max | 40                      |
| Hematocrit                  | Hematocrit                           | Temporal           | Lab Results             | %      | 10-80       | -6 to 0, -12 to -6, -18 to -12, -24 to -18, -30 to -24, -36 to -24, -42 to -36, -48 to -42 | length, min, mean, median, max | 40                      |
| Hemo_A1C                    | Hemoglobin A1c (Glycohemoglobin)     | Temporal           | Lab Results             | %      | 0-24        | -6 to 0, -12 to -6, -18 to -12, -24 to -18, -30 to -24, -36 to -24, -42 to -36, -48 to -42 | length, min, mean, median, max | 40                      |
| Hgb                         | Hemoglobin                           | Temporal           | Lab Results             | g/dL   | 2-20        | -6 to 0, -12 to -6, -18 to -12, -24 to -18, -30 to -24, -36 to -24, -42 to -36, -48 to -42 | length, min, mean, median, max | 40                      |
| INR                         | International Normalized Ratio       | Temporal           | Lab Results             | ratio  | 0.3-10      | -6 to 0, -12 to -6, -18 to -12, -24 to -18, -30 to -24, -36 to -24, -42 to -36, -48 to -42 | length, min, mean, median, max | 40                      |

|                      |                                      |          |             |                 |          |                                                                                            |                                |    |
|----------------------|--------------------------------------|----------|-------------|-----------------|----------|--------------------------------------------------------------------------------------------|--------------------------------|----|
| LDLC                 | Low-Density Lipoprotein Cholesterol  | Temporal | Lab Results | mg/dL           | 10-300   | -6 to 0, -12 to -6, -18 to -12, -24 to -18, -30 to -24, -36 to -24, -42 to -36, -48 to -42 | length, min, mean, median, max | 40 |
| MC_Ratio             | Microalbumin-to-Creatinine Ratio     | Temporal | Lab Results | mg/g            | 0-30000  | -6 to 0, -12 to -6, -18 to -12, -24 to -18, -30 to -24, -36 to -24, -42 to -36, -48 to -42 | length, min, mean, median, max | 40 |
| Phosphate            | Serum Phosphate                      | Temporal | Lab Results | mg/dL           | 0.1-20   | -6 to 0, -12 to -6, -18 to -12, -24 to -18, -30 to -24, -36 to -24, -42 to -36, -48 to -42 | length, min, mean, median, max | 40 |
| Platelet             | Platelet Count                       | Temporal | Lab Results | count/volume    | 0-1000   | -6 to 0, -12 to -6, -18 to -12, -24 to -18, -30 to -24, -36 to -24, -42 to -36, -48 to -42 | length, min, mean, median, max | 40 |
| Potassium            | Serum Potassium                      | Temporal | Lab Results | meq/L or mmol/L | 1-10     | -6 to 0, -12 to -6, -18 to -12, -24 to -18, -30 to -24, -36 to -24, -42 to -36, -48 to -42 | length, min, mean, median, max | 40 |
| sCr                  | Serum Creatinine                     | Temporal | Lab Results | mg/dL           | 0.4-20   | -6 to 0, -12 to -6, -18 to -12, -24 to -18, -30 to -24, -36 to -24, -42 to -36, -48 to -42 | length, min, mean, median, max | 40 |
| Sodium               | Serum Sodium                         | Temporal | Lab Results | meq/L or mmol/L | 90-190   | -6 to 0, -12 to -6, -18 to -12, -24 to -18, -30 to -24, -36 to -24, -42 to -36, -48 to -42 | length, min, mean, median, max | 40 |
| Tot chole            | Total Cholesterol                    | Temporal | Lab Results | mg/dL           | 10-1000  | -6 to 0, -12 to -6, -18 to -12, -24 to -18, -30 to -24, -36 to -24, -42 to -36, -48 to -42 | length, min, mean, median, max | 40 |
| Triglyceride         | Triglyceride                         | Temporal | Lab Results | mg/dL           | 10-10000 | -6 to 0, -12 to -6, -18 to -12, -24 to -18, -30 to -24, -36 to -24, -42 to -36, -48 to -42 | length, min, mean, median, max | 40 |
| WBC                  | Total White Blood Cell Count         | Temporal | Lab Results | k/uL or k/mm^3  | 0-50000  | -6 to 0, -12 to -6, -18 to -12, -24 to -18, -30 to -24, -36 to -24, -42 to -36, -48 to -42 | length, min, mean, median, max | 40 |
| WT                   | Inpatient Weight                     | Temporal | Vital Signs | pound           | 60-700   | -6 to 0, -12 to -6, -18 to -12, -24 to -18, -30 to -24, -36 to -24, -42 to -36, -48 to -42 | length, min, mean, median, max | 40 |
| Systolic             | Systolic Blood Pressure              | Temporal | Vital Signs | mmHg            | 50-240   | -6 to 0, -12 to -6, -18 to -12, -24 to -18, -30 to -24, -36 to -24, -42 to -36, -48 to -42 | length, min, mean, median, max | 40 |
| Diastolic            | Diastolic Blood Pressure             | Temporal | Vital Signs | mmHg            | 30-150   | -6 to 0, -12 to -6, -18 to -12, -24 to -18, -30 to -24, -36 to -24, -42 to -36, -48 to -42 | length, min, mean, median, max | 40 |
| R                    | Respiratory Rate                     | Temporal | Vital Signs | breaths/minute  | 6-50     | -6 to 0, -12 to -6, -18 to -12, -24 to -18, -30 to -24, -36 to -24, -42 to -36, -48 to -42 | length, min, mean, median, max | 40 |
| T                    | Temperature                          | Temporal | Vital Signs | Fahrenheit      | 80-110   | -6 to 0, -12 to -6, -18 to -12, -24 to -18, -30 to -24, -36 to -24, -42 to -36, -48 to -42 | length, min, mean, median, max | 40 |
| Pulse                | Pulse                                | Temporal | Vital Signs | beats/minute    | 30-200   | -6 to 0, -12 to -6, -18 to -12, -24 to -18, -30 to -24, -36 to -24, -42 to -36, -48 to -42 | length, min, mean, median, max | 40 |
| PO2                  | Partial Pressure of Oxygen           | Temporal | Vital Signs | mmHg            | 30-100   | -6 to 0, -12 to -6, -18 to -12, -24 to -18, -30 to -24, -36 to -24, -42 to -36, -48 to -42 | length, min, mean, median, max | 40 |
| CVP                  | Central Venous Pressure              | Temporal | Vital Signs | mmHg            | 0.5-30   | -6 to 0, -12 to -6, -18 to -12, -24 to -18, -30 to -24, -36 to -24, -42 to -36, -48 to -42 | length, min, mean, median, max | 40 |
| cr_ratio to baseline | Fold Change from Baseline Creatinine | Temporal | Lab Results | mg/dL           |          | -6 to 0                                                                                    |                                | 1  |
| cr_diff to baseline  | Absolute Value Change from Baseline  | Temporal | Lab Results | mg/dL           |          | -6 to 0                                                                                    |                                | 1  |
| bun_to_cr_ratio      | BUN-to-Serum Creatine Ratio          | Temporal | Lab Results | mg/dL           |          | -6 to 0                                                                                    |                                | 1  |
| current_aki_stage    | Current AKI Stage                    | Temporal |             |                 |          | no_aki, aki_1, aki_2, aki_3, aki_3d                                                        |                                | 1  |
